# Supplementary figures and images for: FUT9-Driven Programming of Colon Cancer Cells towards a Stem Cell-Like State
Source: MDPI journal article supplement (doi:10.3390/cancers12092580), 2020-09-10

# **IMMUNOBLOT IMAGES**

# FIGURE 1B

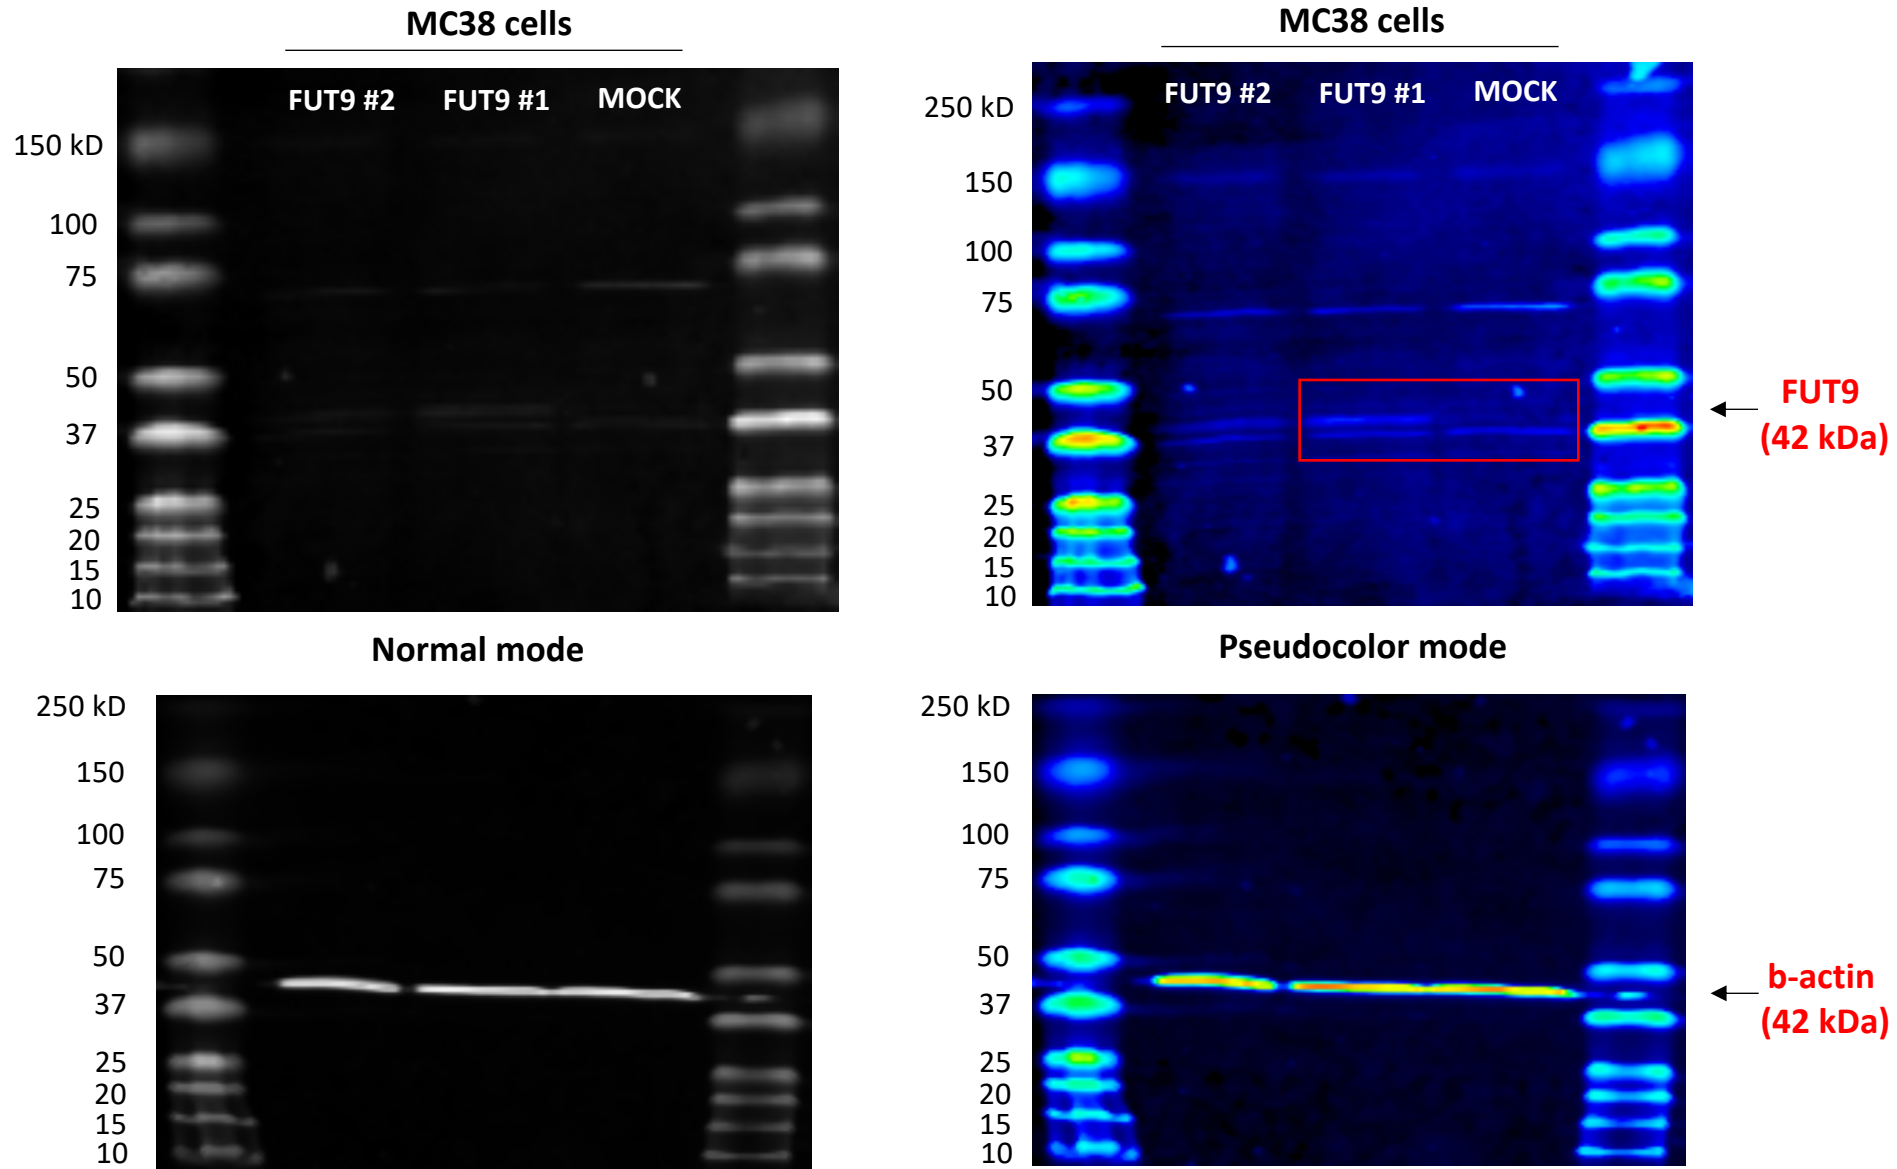

Supplement: s1 [file s1]
